# Supplementary material for: In-Lipid Structure of Pressure-Sensitive Domains Hints Mechanosensitive Channel Functional Diversity
Source: PubMed Central journal article supplement (PMC7376121; doi:10.1016/j.bpj.2020.06.012), 2020-06-23
Supplement: mmc1.pdf [file mmc1.pdf]

**Biophysical Journal, Volume 119**

**Supplemental Information**

**In-Lipid Structure of Pressure-Sensitive Domains Hints Mechanosensitive Channel Functional Diversity**

**Charalampos Kapsalis, Yue Ma, Bela E. Bode, and Christos Pliotas**

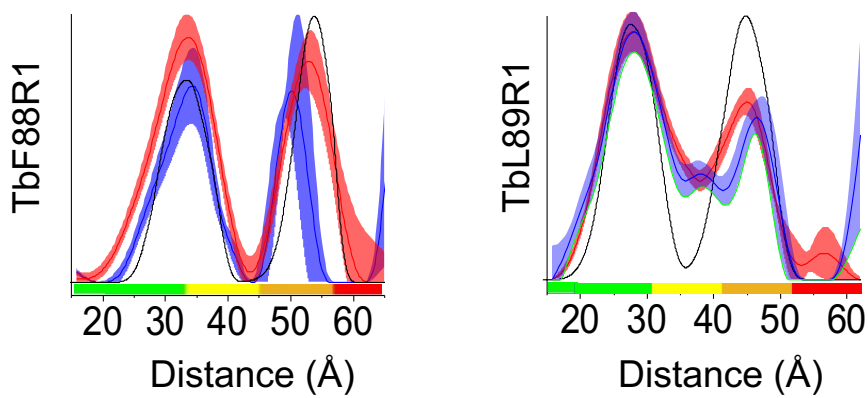

**Fig. S1:** Liposome (*E coli* polar extract) (shaded blue) and NDs (DMPC) (shaded red) PELDOR distance distributions compared to the modelled distances simulated from the x-ray (closed state) crystal structure (PDB 2OAR) using MtsslWizard (black line) for TbMscL F88R1 and L89R1.

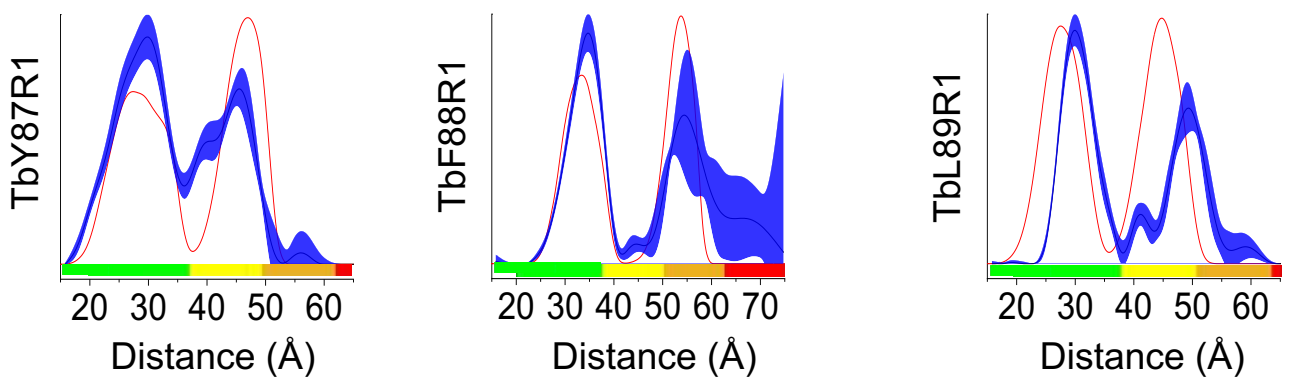

**Fig. S2:** PELDOR distance distributions of TbMscL in DDM (shaded blue) compared to the modelled distances simulated from the x-ray (closed state) crystal structure (PDB 2OAR) with MtsslWizard (red line).

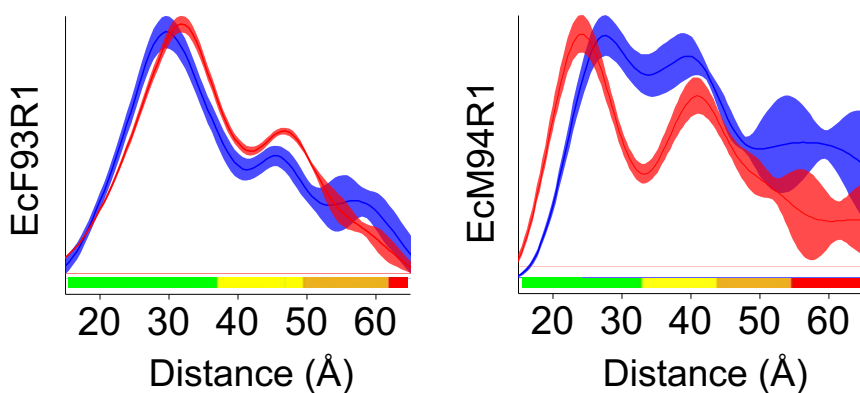

**Fig. S3:** EcMscL mutants PELDOR distance distribution comparison in DDM detergent (shade blue) and in nanodiscs (NDs) (shaded red).

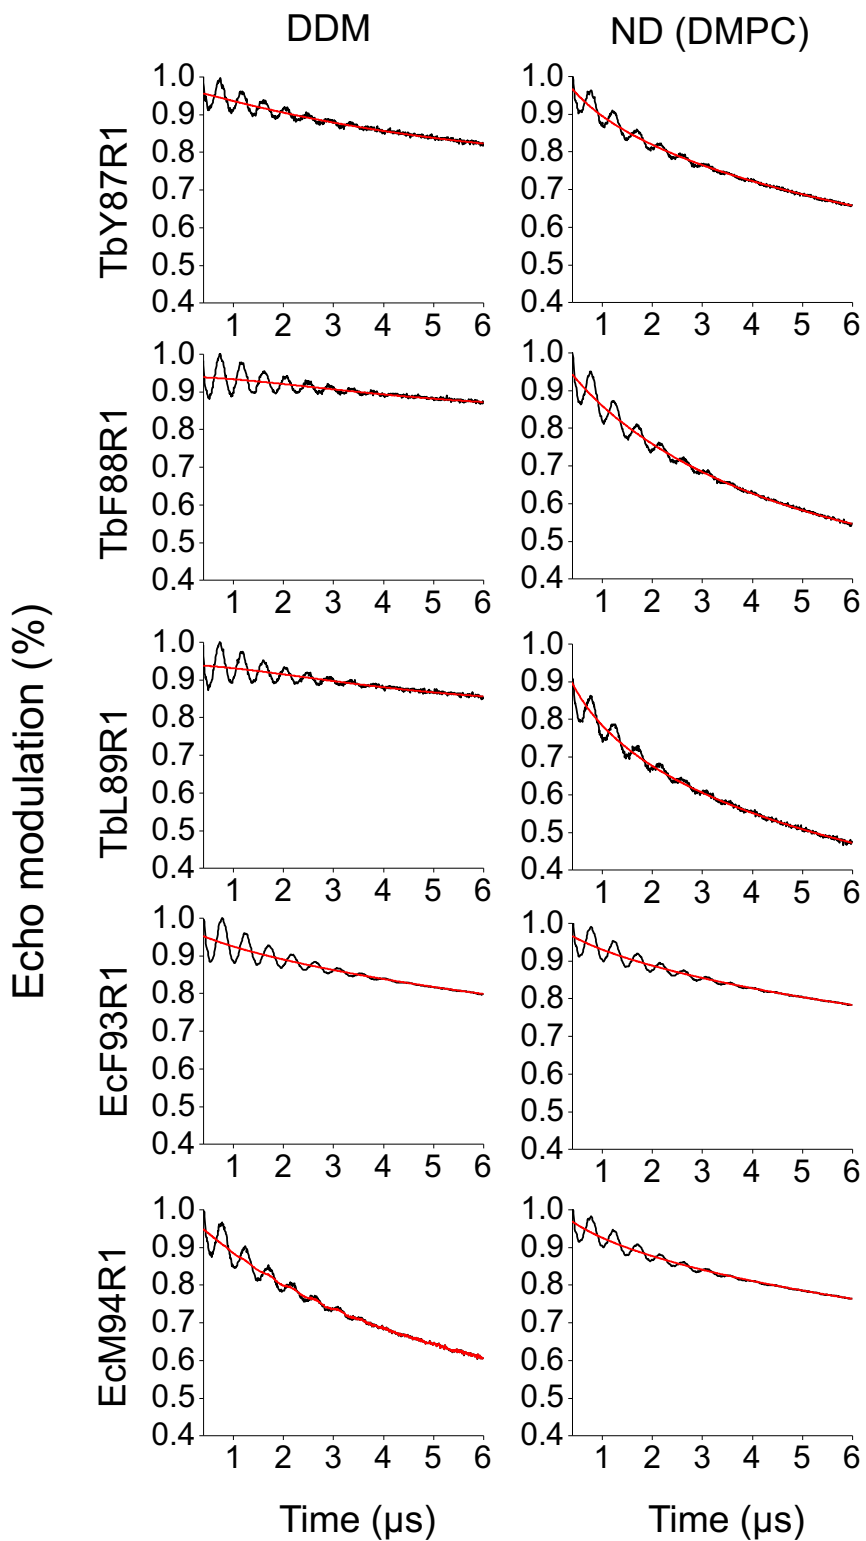

**Fig. S4:** Raw 3p-ESEEM data (black lines) and stretched exponential background fits (red lines).

|                        |   | 1  | 2     | 3     | 4     | 5     |
|------------------------|---|----|-------|-------|-------|-------|
| <i>M. tuberculosis</i> | 1 |    | 29.45 | 21.66 | 29.75 | 68.99 |
| <i>E. coli</i>         | 2 | 39 |       | 21.99 | 47.45 | 25.31 |
| <i>M. acetivorans</i>  | 3 | 62 | 45    |       | 30.77 | 20.99 |
| <i>S. aureus</i>       | 4 | 45 | 18    | 39    |       | 28.03 |
| <i>M. leprae</i>       | 5 | 11 | 34    | 69    | 40    |       |

**Table S1:** Pairwise alignment comparison between MscL orthologues. % sequence identity is shown in the upper/right half of the table and sequence residue gaps are shown in the lower/left half.

a.

| Mutant  | $D_1$ ; $D_2$ ; $D_2/D_1$ in DDM (Å) | $D_1$ ; $D_2$ ; $D_2/D_1$ in NDs (Å) |
|---------|--------------------------------------|--------------------------------------|
| TbY87R1 | 29.7; 45.6; 1.55                     | 26.3; 41.1; 1.57                     |
| TbF88R1 | 34.1; 55.8; 1.64                     | 33.6; 53.1; 1.58                     |
| TbL89R1 | 30.0; 48.8; 1.63                     | 27.8; 45.4; 1.63                     |
| EcF93R1 | 29.6; 45.8; 1.55                     | 31.8; 46.9; 1.47                     |
| EcM94R1 | 27.7; 39.1; 1.41                     | 24.1; 40.7; 1.69                     |

b.

| $D_1$ (TbL) – $D_1$ (EcL) | DDM (Å) | NDs (Å) |
|---------------------------|---------|---------|
| TbY87R1 - EcF93R1         | 0.1     | -5.5    |
| TbF88R1 - EcF93R1         | 4.5     | 1.8     |
| TbF88R1 - EcM94R1         | 6.4     | 9.5     |
| TbL89R1 - EcM94R1         | 2.3     | 3.7     |

**Table S2:** a.  $D_1$  and  $D_2$  PELDOR distance for each mutant in DDM and in nanodiscs (NDs) and their ratio. The expected ratios for symmetric multimers are 1.41 for a tetramer, 1.62 for a pentamer and 1.73 for a hexamer b.  $D_1$  distance differences between distinct mutants for the two orthologues.

| <b>Mutant</b> | <b>% change in <sup>2</sup>H accessibility</b> |
|---------------|------------------------------------------------|
| TbY87R1       | (23±5)%                                        |
| TbF88R1       | (28±4)%                                        |
| TbL89R1       | (32±7)%                                        |
| EcF93R1       | -(27±4)%                                       |
| EcM94R1       | -(19±4)%                                       |

**Table S3:** Percentage (%) change in deuterium (solvent) accessibility of MscL in detergent (DDM) following reconstitution in Nanodiscs (DMPC).
